# Supplementary material for: Luminescent hollow CaWO4microspheres: template-free synthesis, characterization and application in drug delivery
Source: Royal Society of Chemistry journal article supplement (doi:10.1039/c5ra20633b), 2015-01-01
Supplement: c5ra20633b1.pdf [file c5ra20633b1.pdf]

## Electronic Supplementary Information (ESI)

### Luminescent Hollow $\text{CaWO}_4$ Microspheres: Template-Free Synthesis, Characterization and Application in Drug Delivery

Boshi Tian,<sup>a</sup> Mengnan Wang,<sup>a</sup> Chunxia Liu,<sup>a</sup> Shaohua Liu,<sup>a</sup> Lin Jin,<sup>a</sup> Xiqing Yan,<sup>b</sup> Chunyang, Li,<sup>a</sup> Zhenling Wang<sup>a,\*</sup>

<sup>a</sup> The Key Laboratory of Rare Earth Functional Materials and Applications, Zhoukou Normal University, Zhoukou 466001, P. R. China

<sup>b</sup> College of Pharmacy, Xinxiang Medical University, Xinxiang 453003, P. R. China

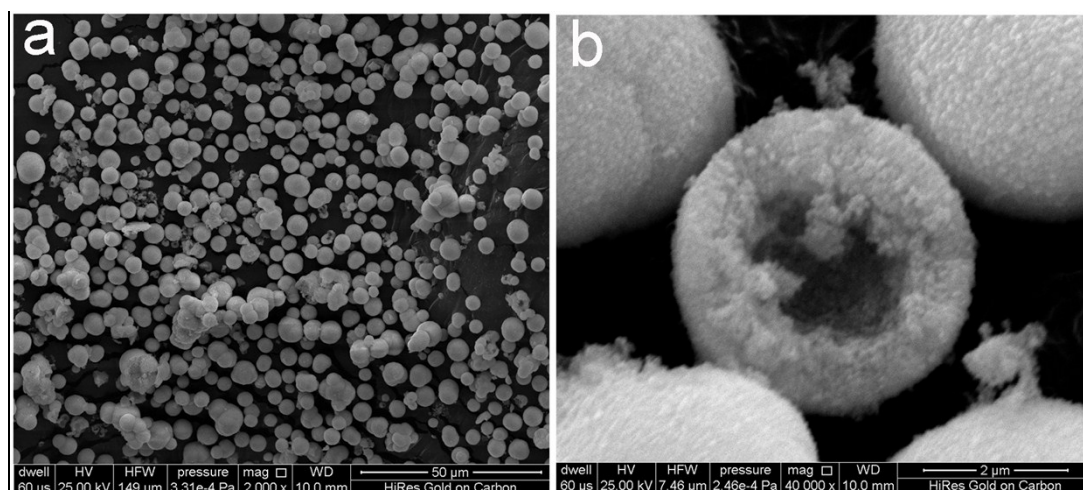

**Fig. S1** SEM images with (a) low and (b) high magnification of  $\text{CaWO}_4$  microspheres synthesized with the aid of template (T- $\text{CaWO}_4$  microspheres).

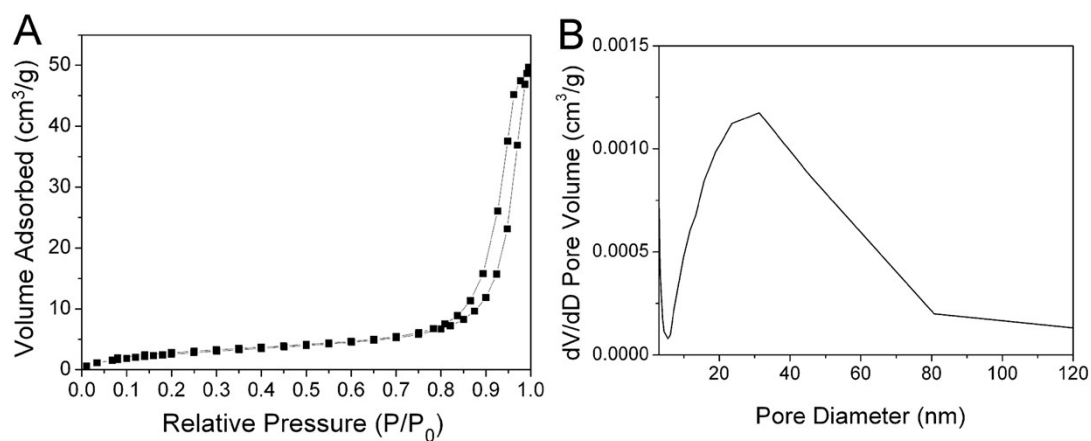

**Fig. S2** (A)  $\text{N}_2$  adsorption/desorption isotherms and (B) pore size distribution of T- $\text{CaWO}_4$  microspheres.

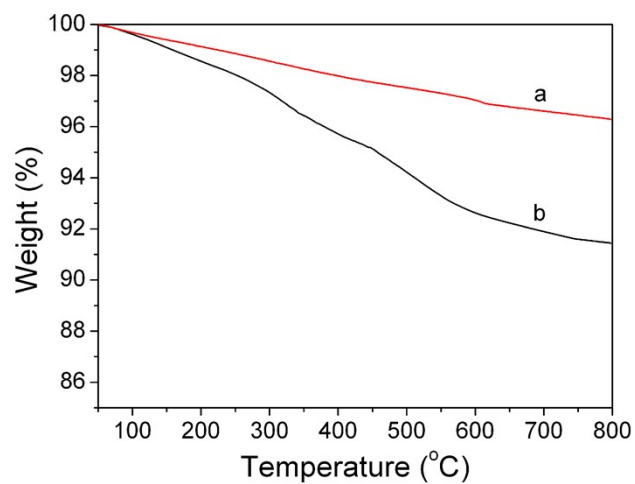

**Fig. S3** TGA curves of T-CaWO<sub>4</sub> microspheres (a) before and (b) after loading of IBU.

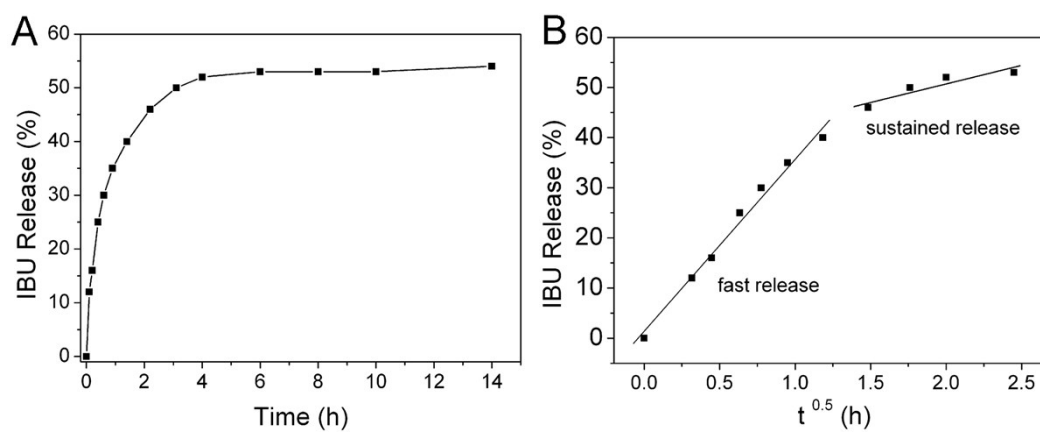

**Fig. S4** (A) Cumulative IBU release from T-CaWO<sub>4</sub> microspheres in pH = 7.4 PBS solution. (B) Higuchi square root of time plot for the release of IBU from T-CaWO<sub>4</sub> microspheres.
